# Supplementary material
Source: PubMed Central journal article supplement (PMC3771858)
Supplement: NIHMS472839-supplement.pdf [file NIHMS472839-supplement.pdf]

**‘The role of cytoskeleton networks on lipid-mediated delivery of DNA’  
by Coppola et al.**

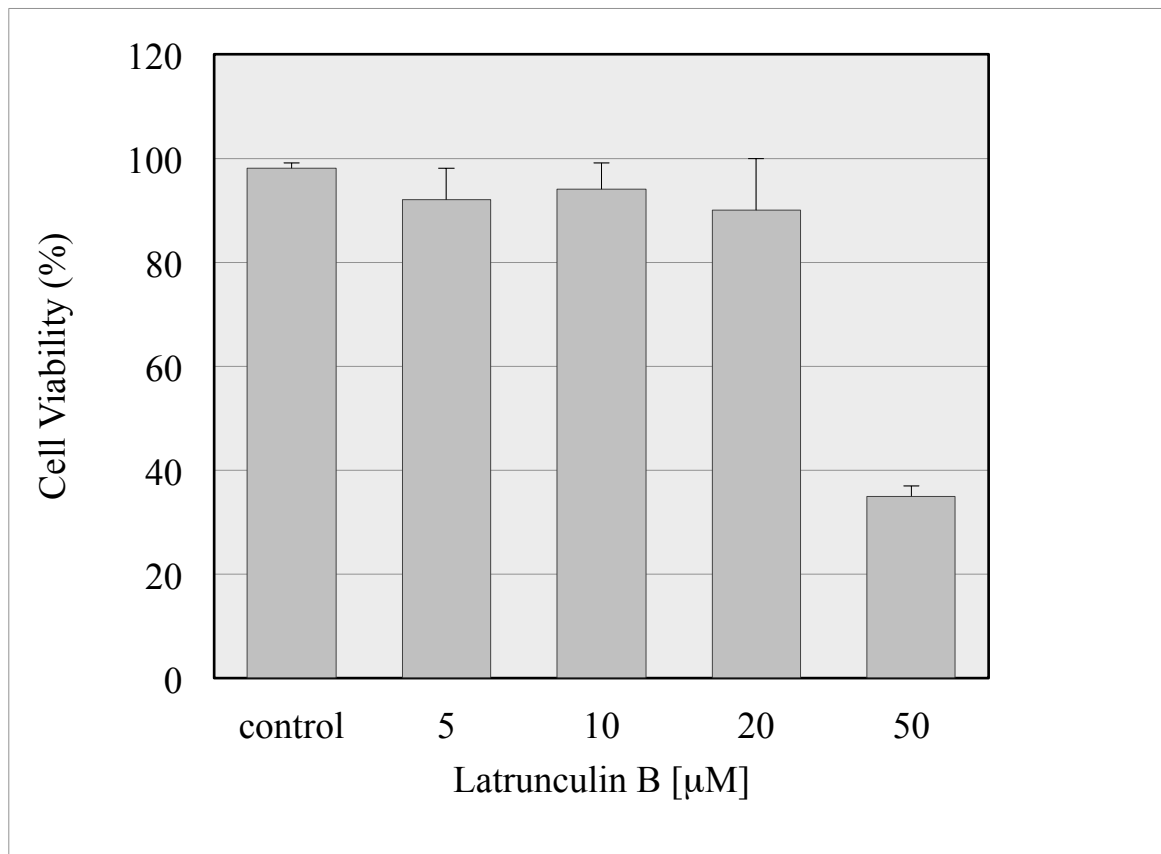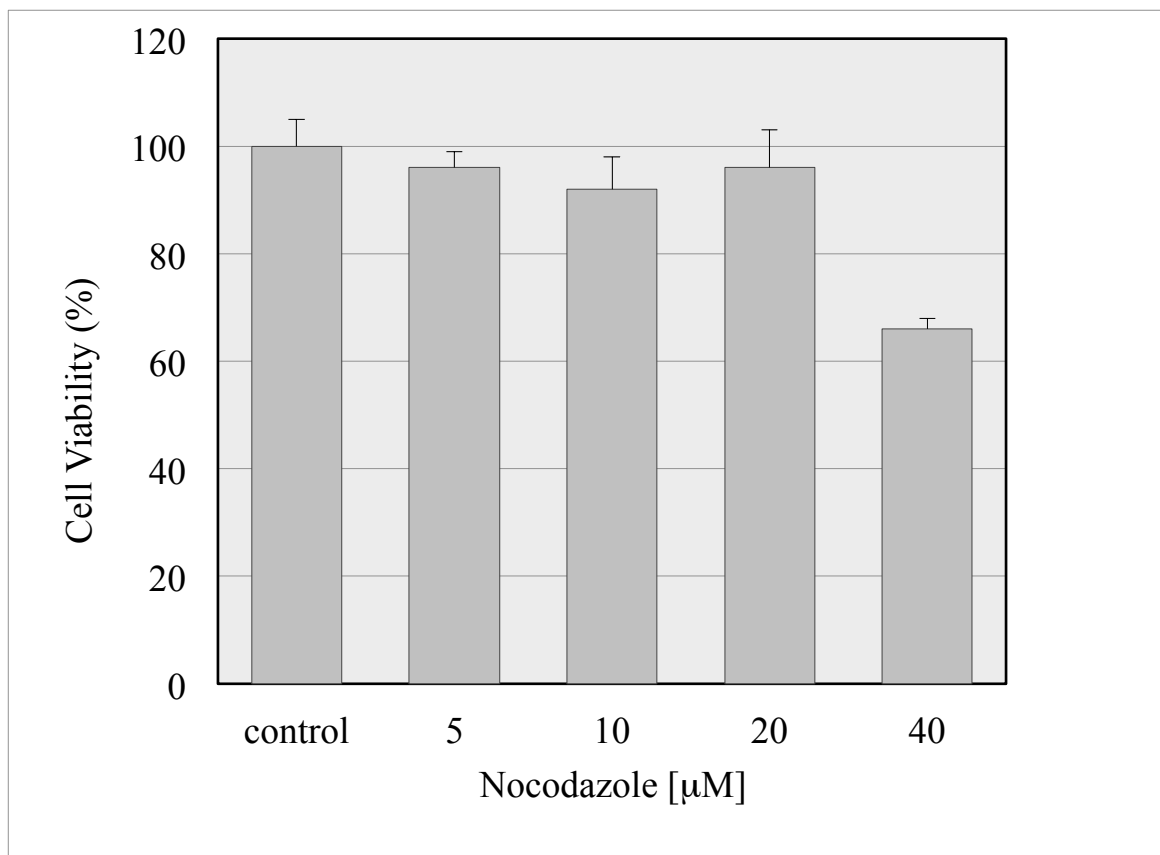

**Figure S1.** Cell viability of CHO cells as a function of increasing concentrations of inhibitors.

**‘The role of cytoskeleton networks on lipid-mediated delivery of DNA’  
by Coppola et al.**

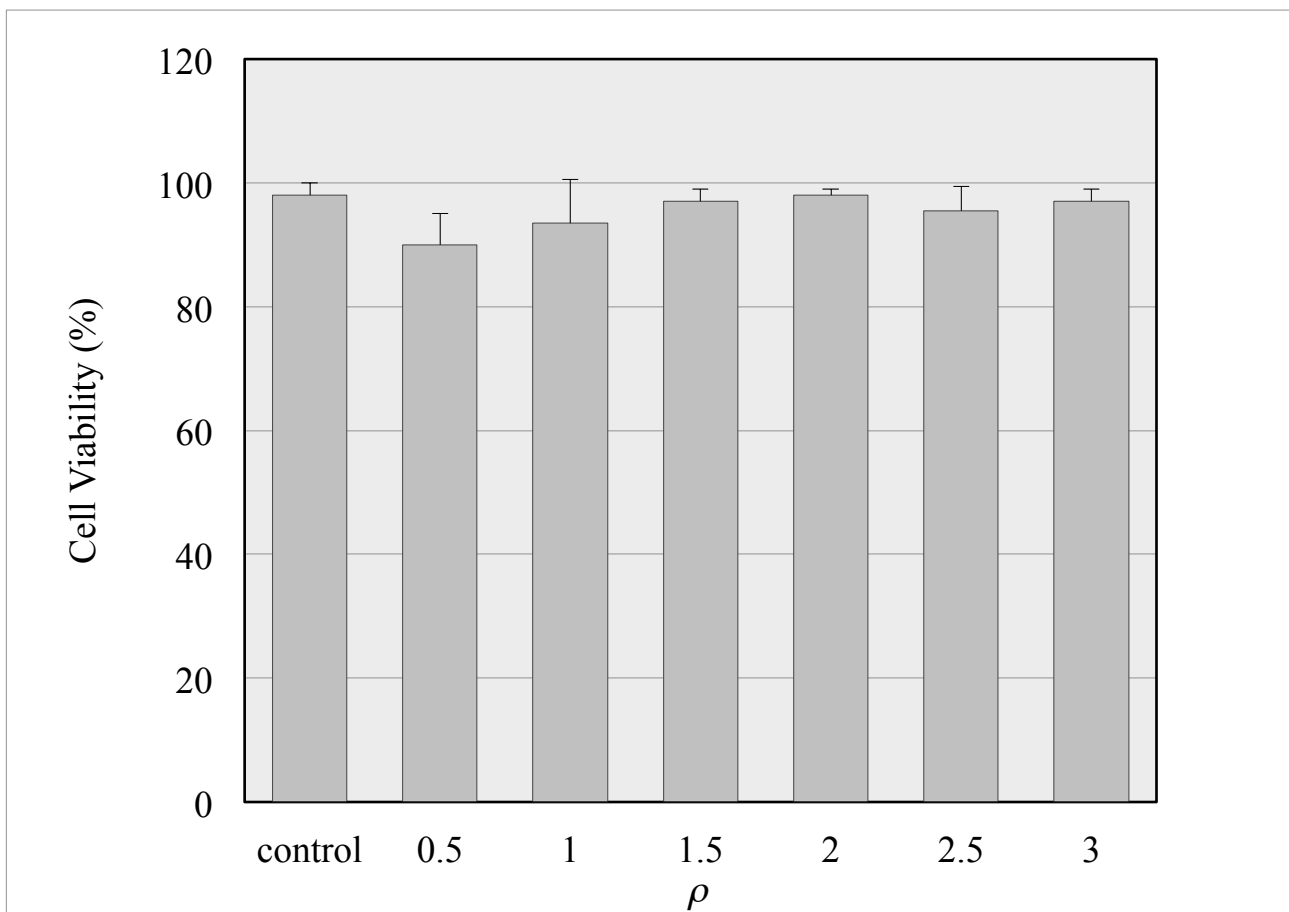

**Figure S2.** Cell viability of CHO cells as a function of increasing cationic lipid/anionic DNA charge ratio,  $\rho$ , in MC lipoplexes.

**‘The role of cytoskeleton networks on lipid-mediated delivery of DNA’  
by Coppola et al.**

**Figure S3**

**Actin recovery after  
Latrunculin B treatment**

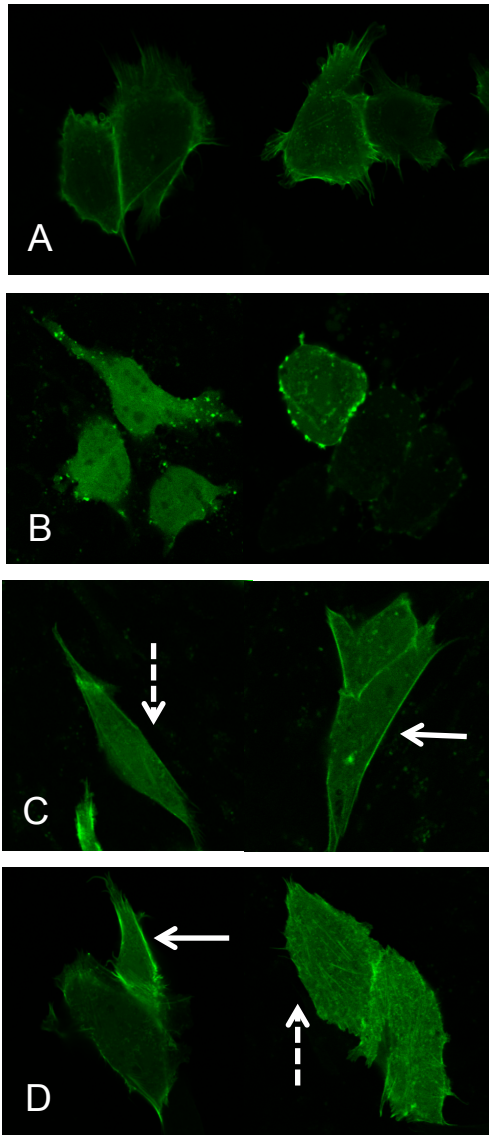

Actin cytoskeleton staining of CHO cells by Actin-Green Fluorescent Protein (panel A). Actin cytoskeleton recovery after Latrunculin B-treatment: t=15 minutes (panel B); t=4h (panel C); t=8h (panel D). Solid lines indicate newly formed microfilaments, while dotted lines indicate regions of the plasma membrane where only poorly formed, if any, actin microfilaments are visible.

**Microtubule recovery after  
Nocodazole treatment**

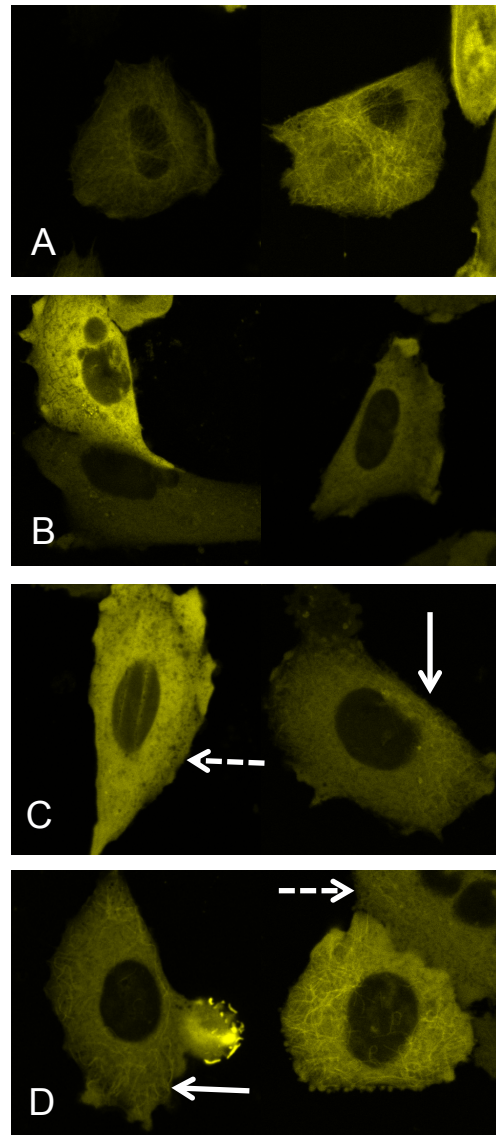

Tubulin cytoskeleton staining of CHO cells by Tubulin-Yellow Fluorescent Protein (panel A). Tubulin cytoskeleton recovery after Nocodazole-treatment: t=15 minutes (panel B); t=4h (panel C); t=8h (panel D). Solid lines indicate newly formed microtubules, while dotted lines indicate regions of the cytoplasm where only poorly formed, if any, microtubules can be seen.

**‘The role of cytoskeleton networks on lipid-mediated delivery of DNA’  
by Coppola et al.**

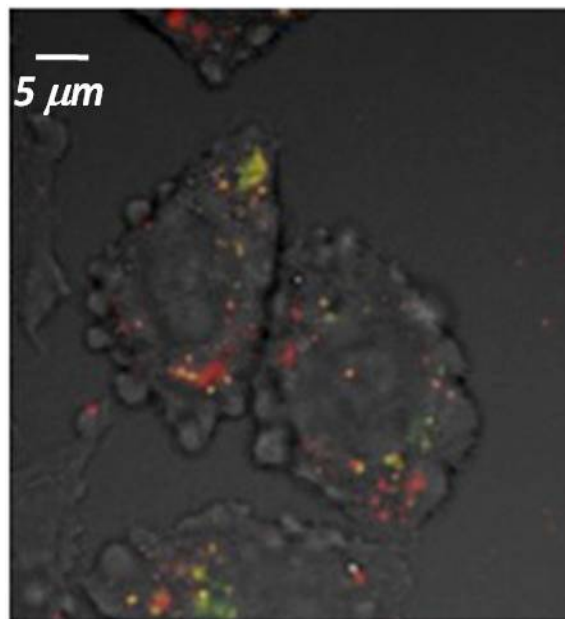

**Figure S4.** Representative CLSM image of LAT-treated cells more than 3 hours from lipoplex administration. A minor fraction of lipoplexes (red) was found to co-localize with lysosomes (green).

**‘The role of cytoskeleton networks on lipid-mediated delivery of DNA’  
by Coppola et al.**

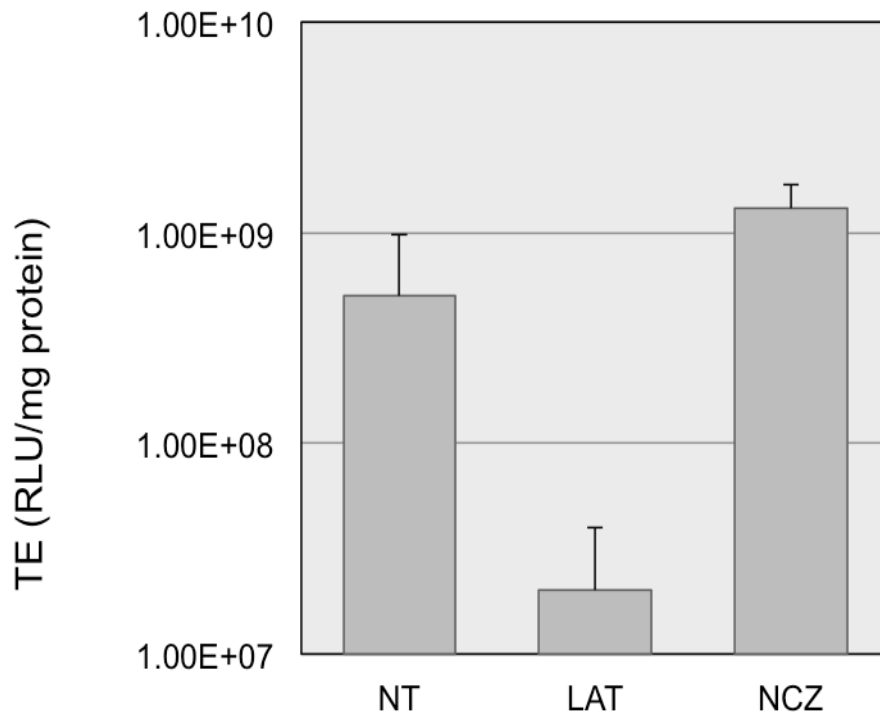

**Figure S5.** Transfection Efficiency (TE) of multicomponent lipoplexes in untreated (NT) CHO cells and after treatment with Latrunculin B (LAT) and Nocodazole (NCZ). Experiments were performed at the Center for Nanotechnology Innovation @NEST using a Luciferase Assay kit (Promega.Madison, WI) following the manufacturer’s instructions.
